# Supplementary material
Source: HighWire-hosted journal article supplement (https://ez-admanager.com/highwire/filestream/136828/field_highwire_adjunct_files/0/rayner_1642.pdf)
Supplement: rayner_1642.pdf [file rayner_1642.pdf]

# Los mecanismos de la alteración de memoria en la epilepsia dependen de la edad de inicio de la enfermedad

Genevieve Rayner, PhD  
Graeme D. Jackson, MD  
Sarah J. Wilson, PhD

Correspondencia y solicitud de  
separatas al Dr. Rayner:  
raynerg@unimelb.edu.au

## RESUMEN

**Objetivo:** En este estudio, nos propusimos descubrir antecedentes diferentes de alteración de la memoria autobiográfica en pacientes con epilepsia de comienzo temprano (infancia/adolescencia) vs tardío (adultez).

**Métodos:** Participaron 166 adultos: 92 pacientes con epilepsia focal, cuyo funcionamiento cognitivo y psiquiátrico fue comparado con 72 controles sanos. Los predictores de déficit de memoria autobiográfica fueron contrastados entre los pacientes con epilepsia de comienzo temprano (n = 47) vs tardío (n = 45).

**Resultados:** Globalmente, las personas con epilepsia se desempeñaron significativamente peor en las mediciones tanto de memoria autobiográfica semántica como episódica, y mostraron tasas marcadamente superiores de síntomas y trastornos depresivos ( $p < 0,001$ ). La memoria autobiográfica reducida en pacientes con epilepsia de comienzo temprano estuvo asociada con menor edad de comienzo, crisis más frecuentes y memoria de trabajo reducida. En contraste, la dificultad que tuvieron los pacientes con epilepsia de comienzo tardío en recordar información autobiográfica estuvo asociada a depresión y a la presencia de una lesión identificada en la RM.

**Conclusiones:** Este estudio revela que los déficits de memoria en personas con epilepsia focal tienen diferentes antecedentes dependiendo del momento de inicio de enfermedad. Mientras que los factores neurobiológicos determinan fuertemente la función autobiográfica reducida en los pacientes con epilepsia de inicio temprano, la inadaptación psicológica determina las alteraciones en pacientes con epilepsia de comienzo tardío. Más aún, estos hallazgos apoyan la práctica de sub-clasificar pacientes de acuerdo con sus características clínicas distintivas para encontrar predictores individualizados de disfunción cognitiva. *Neurology*® 2016;87:1642–1649

## GLOSARIO

**DSM-IV** = *Diagnostic and Statistical Manual of Mental Disorders (Fourth Edition)* (Manual Diagnóstico y Estadístico de Trastornos Mentales (4ta edición)); **EMA** = Entrevista de Memoria Autobiográfica; **IQEC** = IQ de escala completa; **NDDI-E** = *Neurological Disorders Depression Inventory for Epilepsy* (Inventario de Depresión en Trastornos Neurológicos para Epilepsia); **RMA** = Red de Memoria Autobiográfica; **SCID** = *Structured Clinical Interview for DSM-IV Axis I Disorders* (Entrevista Clínica Estructurada para el Eje I de Trastornos del DSM-IV); **TE** = tamaño de efecto.

La alteración cognitiva es común en personas con epilepsia, siendo particularmente importantes los déficits de la memoria autobiográfica. En relación con los controles sanos, los pacientes con epilepsia focal tienen un pobre rendimiento al recordar información personal relevante de su vida.<sup>1,2</sup> Estos déficits marcados ocurren frecuentemente en el contexto de solo un leve decremento en los tests neuropsicológicos estándar de memoria verbal y visual,<sup>1</sup> indicando que las alteraciones autobiográficas pueden ser la característica cognitiva más prominente.

La fenotipificación neurocognitiva de pacientes tiene el potencial de proveer información más precisa e individualizada para el manejo y tratamiento. Hay evidencia creciente de que el desarrollo de sustratos cognitivos puede estar alterado por las crisis habituales en la infancia,<sup>3</sup> aportando un mecanismo para el decremento de memoria específico de la epilepsia de comienzo en la infancia. Por otro lado, los mecanismos subyacentes a los déficits de memoria autobiográfica específicos de la epilepsia de inicio en el adulto permanecen poco claros. La elevada tasa de depresión en adultos con epilepsia en comparación con aquellos sin la enfermedad puede aportar uno de estos mecanismos,<sup>4</sup> ya que la pobre memoria autobiográfica está fuertemente asociada a la depresión.<sup>5</sup>

Del Melbourne School of Psychological Sciences (G.R., S.J.W.), La University of Melbourne; El Florey Institute of Neuroscience and Mental Health (G.R., G.D.J., S.J.W.), Brain Research Institute, The University of Melbourne, Heidelberg; and Comprehensive Epilepsy Programme (G.D.J., S.J.W.), Austin Health, Melbourne Brain Centre, Heidelberg, Australia.

Ir a [Neurology.org](http://Neurology.org) para declaraciones de intereses completas. La información sobre fondos y aquellas declaraciones relevantes para los autores, si existiesen, se encuentran al final del artículo.

En este estudio, examinamos si el antecedente de déficit de memoria en personas con epilepsia está influenciado por el momento de inicio de enfermedad. Postulamos la hipótesis de que las alteraciones en individuos con crisis emergentes en el período crítico del neurodesarrollo de la infancia/adolescencia están relacionadas con factores asociados a la epilepsia; por otro lado, la recolección autobiográfica reducida en epilepsia de reciente comienzo está relacionada con factores no epilépticos, como la depresión.

**MÉTODOS Participantes.** Un total de 166 adultos participaron en este estudio prospectivo. Los criterios de inclusión fueron: (1) edad de 18 años o más, (2) IQ de escala completa (IQEC) por encima del rango alterado (por ej., > 70), (3) sin neurocirugía y (4) inglés funcional. La muestra de pacientes incluyó 92 individuos con epilepsia focal, reclutados de forma consecutiva a través del *Comprehensive Epilepsy Programme* (Programa Exhaustivo de Epilepsia) en Austin Health, Melbourne, entre 2010 y 2015. Los focos epileptogénicos fueron identificados por métodos establecidos de nuestro grupo.<sup>6</sup> La muestra control incluyó 74 individuos sin historia neurológica o psiquiátrica reclutados de las familias de los pacientes como medio de pareo sociodemográfico, con instrucciones de impedir la contaminación cruzada.

La información demográfica y médica se describe en la tabla 1. Los pacientes no difirieron de los controles en edad, sexo o años de educación ( $p > 0,050$ ). La muestra

control tuvo una IQEC media ligeramente superior que los pacientes ( $t_{152} = -2,631$ ;  $p = 0,009$ ,  $\eta^2 = 0,043$ , tamaño del efecto [TE] pequeño-mediano); sin embargo, los puntajes medios para ambos grupos entraron dentro del rango promedio (por ej., 90-110).

**Aprobaciones estándar del protocolo, registros y consentimiento de pacientes.** El estudio fue aprobado por los comités relevantes de investigación ética en humanos y todos los pacientes firmaron su consentimiento informado por escrito de acuerdo con la Declaración de Helsinki.

**Evaluación neuropsicológica. Memoria autobiográfica.** La Entrevista de Memoria Autobiográfica (EMA)<sup>7</sup> es una entrevista semi estructurada que evalúa memorias personales de la infancia, adultez temprana y vida reciente. El *Esquema Personal Semántico* recuerda hechos personales relevantes (por ej., nombres de compañeros de clase; máximo = 63). Los puntajes  $\leq 47$  están asociados con síndrome amnésico y puntajes de 48 y 49 son indicativos de probable síndrome amnésico. El *Esquema Incidental Autobiográfico* recuerda 3 episodios personales de cada período (por ej., un casamiento; máximo = 27), puntuado de acuerdo con la riqueza del detalle y cuán preciso se localizan en lugar y tiempo; puntajes  $\leq 12$  están asociados con un síndrome amnésico y de 13 a 15 son indicativos de un probable síndrome amnésico.

**Función de memoria ampliada.** Usamos la Escala de Memoria de Wechsler-Cuarta Edición,<sup>8</sup> específicamente, la memoria auditiva-verbal fue evaluada con índices de recuerdo inmediato y retrasado del subtest de Asociados Verbales Pareados, el aprendizaje visual fue

**Tabla 1 Perfil demográfico y clínico de la muestra (N = 166)**

|                                                               | Pacientes con epilepsia (n = 92)           | Controles sanos (n = 74)                     |
|---------------------------------------------------------------|--------------------------------------------|----------------------------------------------|
| Edad, media $\pm$ DE (rango), años                            | 41.020 $\pm$ 12.844 (20-69)                | 45.43 $\pm$ 15.648 (21-69)                   |
| Sexo, femenino, n (%)                                         | 54 (59)                                    | 46 (60)                                      |
| Educación, media $\pm$ DE (rango), años                       | 13.554 $\pm$ 3.253 (5-24)                  | 13.905 $\pm$ 3.281 (9-21)                    |
| Escala completa IQ, media $\pm$ DE (rango)                    | 101.950 $\pm$ 11.221 <sup>a</sup> (72-132) | 106.940 $\pm$ 12.170 <sup>b,c</sup> (71-132) |
| Mano dominante, derecha, n (%)                                | 87 (97) <sup>d</sup>                       | 63 (88) <sup>d</sup>                         |
| Edad de inicio de crisis, media $\pm$ DE (rango), años        | 21.901 $\pm$ 13.583 (1,5-63)               | NA                                           |
| Duración de la epilepsia, media $\pm$ DE (rango), años        | 19.500 $\pm$ 13.600 (2-62)                 | NA                                           |
| Frecuencia mensual promedio de crisis, media $\pm$ DE (rango) | 22,350 $\pm$ 51,960 (1-400)                |                                              |
| $\leq 1$ /mes, n (%)                                          | 23 (25)                                    |                                              |
| Quincenal (2-3/mes), n (%)                                    | 14 (15)                                    | NA                                           |
| Semanal (4-15/mes), n (%)                                     | 35 (38)                                    |                                              |
| Diaria ( $\geq 16$ /mes), n (%)                               | 20 (22)                                    |                                              |
| Lado del foco epileptogénico, n (%)                           |                                            |                                              |
| Izquierdo                                                     | 37 (40)                                    |                                              |
| Derecho                                                       | 46 (50)                                    | NA                                           |
| Bilateral/no claro                                            | 9 (10)                                     |                                              |
| Lesión positiva, n (%)                                        | 59 (64)                                    | NA                                           |
| Monoterapia con droga antiepiléptica, n (%)                   | 21 (23)                                    | NA                                           |

Abreviaturas: NA = no aplica.  
<sup>a</sup>Cuatro casos de datos ausentes.  
<sup>b</sup>Ocho casos de datos ausentes.  
<sup>c</sup> $p < 0,050$ .  
<sup>d</sup>Dos casos de datos ausentes.

evaluado con índices inmediato y retrasado del subtest de Memoria de Diseño y la memoria de trabajo fue evaluada utilizando el subtest de Span de Símbolos. Todos los subtests fueron puntuados de acuerdo con los datos normativos por escala de edad ( $M = 10 \pm 3$ ).

**Evaluación del ánimo.** La evaluación neuropsiquiátrica fue realizada con la *Structured Clinical Interview for DSM-IV Axis I Disorders* (SCID, Entrevista Clínica Estructurada para el Eje I de Trastornos del DSM-IV), la medición *gold standard* para el diagnóstico de trastornos del estado de ánimo de acuerdo con el DSM. Se utilizó la Edición de No-Pacientes.<sup>9</sup> La SCID permite el diagnóstico de manifestaciones de depresión sub-umbrales y atípicas que algunos investigadores consideran como de especial interés para la epilepsia, y asegura que los síntomas no puedan ser atribuidos a la medicación antiepiléptica.

Complementando la SCID, se realizó el *Neurological Disorders Depression Inventory for Epilepsy* (NDDI-E, Inventario de Depresión en Trastornos Neurológicos para Epilepsia)<sup>10</sup> como una medición lineal auto-reportada de síntomas depresivos actuales. Sus 6 ítems son testeados en una escala de 1 = nunca a 4 = siempre/frecuente. Los puntajes de NDDI-E > 15 han demostrado tener una especificidad del 90% y una sensibilidad del 81% para un diagnóstico de depresión en pacientes con epilepsia.

El PHQ-GAD-7 (*Patient Health Questionnaire-Generalised Anxiety Disorder 7-item* [Cuestionario de Salud de Pacientes-Trastorno de Ansiedad Generalizada de 7 ítems]) fue utilizado para evaluar síntomas actuales de ansiedad.<sup>11</sup> Los participantes asignaban puntajes de 0 a 3, a las respuestas “para nada” – “casi todos los días”, respectivamente. Puntajes de 5, 10 y 15 representan puntos de corte para ansiedad, leve, moderada y severa, respectivamente.

**Análisis estadístico.** Los análisis fueron realizados utilizando IBM SPSS 22.0 (IBM Corp., Armonk, NY) con una significancia estadística con  $p < 0,050$  (2 colas). Algunos datos faltaron por interrupciones de crisis o altas, por lo que se usó la prueba MCAR de Little (ausencia completa al azar) en un subgrupo de casos, y mostró que no hubo relación entre la ausencia de datos y cualquier valor ( $\chi^2_{20} = 18,690$ ;  $p > 0,050$ ). Se evaluó una relación lineal entre los índices de memoria autobiográfica y la IQEC en pacientes utilizando gráficos de dispersión y el coeficiente de correlación de Pearson de producto-momento y rechazo, negando cualquier necesidad de covariar para la IQEC.

Los predictores de recuerdo autobiográfico alterado en pacientes con inicio en la infancia/adolescencia (“inicio temprano”;  $n = 47$ ) fueron contrastados con aquellos de pacientes con inicio en la adultez (“inicio tardío”;  $n = 45$ ). Las definiciones del período de desarrollo fueron sacadas de los criterios de la Organización Mundial de la Salud<sup>12</sup>: infancia = 0-8 años, adolescencia = 9-19 años, adultez  $\geq 19$  años. Cada uno de los siguientes análisis fueron realizados de forma separada para pacientes con epilepsia de inicio temprano y tardío.

Para identificar variables que podrían ser predictoras de memoria autobiográfica, se calcularon correlaciones bivariadas de Pearson de producto-momento entre las variables EMA, Escala de Memoria de Wechsler-Cuarta Edición, estado de ánimo y crisis. Esto fue hecho por separado para los índices semántico y episódico de la EMA. Se usaron análisis univariado de varianza o pruebas  $t$  de muestras independientes para evaluar la fortaleza de las relaciones entre los puntajes de memoria autobiográfica y las variables dicotómicas como la historia de depresión.

Las variables que estuvieron significativamente asociadas con la función de memoria autobiográfica fueron luego ingresadas en ecuaciones de regresión jerárquica múltiple para examinar su importancia comparativa en la predicción de puntajes índice semántico y episódico de la EMA para cada grupo, resultando en 4 modelos de regresión (semántica de inicio temprano; episódica temprana; semántica tardía; episódica tardía).

**RESULTADOS** Globalmente, los pacientes con epilepsia se desempeñaron significativamente peor en mediciones tanto de memoria autobiográfica semántica como episódica, como también para todos los índices de recuerdo auditivo-verbal y visual (tabla 2). Consistente con investigaciones previas, los pacientes también tuvieron tasas marcadamente superiores de síntomas y trastornos depresivos ( $p < 0,001$ ). Como no se relacionan directamente con la hipótesis, en el apéndice e-1 en [Neurology.org](http://Neurology.org) está disponible una descripción completa de estos análisis.

**El contexto del neurodesarrollo de los predictores de memoria autobiográfica.** Los correlatos de alteración de la memoria autobiográfica en epilepsia fueron explorados en el contexto del neurodesarrollo de inicio temprano vs tardío. Los individuos con inicio temprano (edad media [M] actual = 37,470; DE = 12,729) tenían menor edad al ser testeados que los pacientes con inicio en la adultez ( $M = 44,730$ ; DE = 12,008;  $t_{90} = -2,813$ ;  $p = 0,006$ ;  $\eta^2 = 0,081$ ; TE mediano-grande), pero tuvieron mayor duración de la epilepsia ( $M = 26,130$  años; DE 14,178 vs  $M = 12,580$ ; DE = 8,743;  $t_{77,081} = 5,543$ ;  $p < 0,001$ ;  $\eta^2 = 0,254$ , TE muy grande). Los 2 grupos de pacientes no difirieron en ninguna otra variable clínica, neuropsicológica o psiquiátrica ( $p > 0,050$ ), incluso la memoria autobiográfica.

**Las alteraciones autobiográficas en epilepsia de inicio temprano se relacionan con la cronicidad de la enfermedad.** Para pacientes con epilepsia de inicio temprano, el pobre recuerdo de hechos semánticos personales relevantes estuvo asociado con una frecuencia promedio mensual de crisis mayor ( $r = -0,327$ ;  $p = 0,012$ , TE mediano). La regresión múltiple concluyó que la frecuencia de crisis influyó en el 11% de la varianza

**Tabla 2 Perfil cognitivo y psiquiátrico de pacientes vs controles**

|                                                    | Pacientes con epilepsia (n = 92)      | Controles sanos (n = 74)                |
|----------------------------------------------------|---------------------------------------|-----------------------------------------|
| EMA semántica total, media ± DE (rango)            | 54,933 ± 5,534 <sup>a</sup> (32,5-63) | 58,339 ± 3,926 <sup>b,c</sup> (46,5-63) |
| EMA episódica total, media ± DE (rango)            | 16,607 ± 4,706 <sup>a</sup> (4-27)    | 21,581 ± 4,629 <sup>b,c</sup> (8-27)    |
| Asociados Verbales Pareados-I, media ± DE (rango)  | 9,000 ± 3,293 <sup>d</sup> (3-17)     | 10 ± 3,0 <sup>e,f</sup>                 |
| Asociados Verbales Pareados-II, media ± DE (rango) | 8,690 ± 3,061 <sup>d</sup> (1-14)     | 10 ± 3,0 <sup>e,g</sup>                 |
| Memoria de Diseño-I, media ± DE (rango)            | 9,000 ± 2,920 <sup>d</sup> (2-16)     | 10 ± 3,0 <sup>e,f</sup>                 |
| Memoria de Diseño-II, media ± DE (rango)           | 9,130 ± 2,349 <sup>d</sup> (3-16)     | 10 ± 3,0 <sup>e,f</sup>                 |
| Span de Símbolos, media ± DE (rango)               | 10,200 ± 2,676 <sup>d</sup> (5-17)    | 10 ± 3,0 <sup>e</sup>                   |
| NDDI-E, media ± DE (rango)                         | 12,590 ± 3,572 <sup>g</sup> (6-20)    | 10,350 ± 2,956 <sup>h</sup> (6-19)      |
| PHQ-GAD-7, media ± DE (rango)                      | 5,770 ± 4,946 <sup>a</sup> (0-19)     | 3,730 ± 4,118 <sup>h</sup> (0-16)       |
| <b>Desempeño del paciente por edad de inicio</b>   | Temprano (n = 47)                     | Tardío (n = 45)                         |
| EMA semántica total, media ± DE (rango)            | 54,904 ± 4,836 (41-63)                | 54,964 ± 6,284 <sup>a</sup> (32-63)     |
| EMA episódica total, media ± DE (rango)            | 16,128 ± 4,902 (4-23)                 | 17,143 ± 4,473 <sup>a</sup> (9-27)      |
| NDDI-E, media ± DE (rango)                         | 12,740 ± 3,977 <sup>i</sup> (6-20)    | 12,430 ± 3,121 <sup>j</sup> (7-19)      |
| PHQ-GAD-7, media ± DE (rango)                      | 5,440 ± 4,786 <sup>k</sup> (0-18)     | 6,130 ± 5,153 <sup>l</sup> (0-19)       |

Abreviaturas: EMA = Entrevista de Memoria Autobiográfica; NDDI-E = Neurological Disorders Depression Inventory for Epilepsy (Inventario de Depresión en Trastornos Neurológicos para Epilepsia); PHQ-GAD-7 = Patient Health Questionnaire-Generalised Anxiety Disorder 7-item (Cuestionario de Salud de Pacientes-Trastorno de Ansiedad Generalizada de 7 ítems).

<sup>a</sup>Tres casos de datos ausentes.

<sup>b</sup>Doce casos de datos ausentes.

<sup>c</sup> $p < 0,001$ .

<sup>d</sup>Catorce casos de datos ausentes.

<sup>e</sup>Niveles normales de desempeño en la tarea aportados por normativas estratificadas por edad.

<sup>f</sup> $p < 0,01$

<sup>g</sup>Trece casos de datos ausentes.

<sup>h</sup>Diez casos de datos ausentes.

<sup>i</sup>Cuatro casos de datos ausentes.

<sup>j</sup>Cinco casos de datos ausentes.

<sup>k</sup>Seis casos de datos ausentes.

<sup>l</sup>Siete casos de datos ausentes.

en la predicción de alteración de la memoria semántica en epilepsia de inicio temprano ( $F_{1,45} = 5,406$ ;  $p = 0,025$ ;  $R^2$  ajustada = 0,087; figura).

El pobre recuerdo de eventos importantes de la vida en personas con epilepsia de inicio temprano estuvo relacionado con una menor edad de comienzo de crisis ( $r = 0,276$ ;  $p = 0,032$ , TE de fuerza media) y menor puntaje en el Span de Símbolos ( $r = 0,330$ ;  $p = 0,046$ , TE de fuerza me-

dia). Agregando el Span de Símbolos y la edad de inicio secuencialmente a una regresión jerárquica múltiple se estableció que, solo con el Span de Símbolos en la ecuación, el modelo influyó en el 10,9% de la varianza ( $F_{1,34} = 4,147$ ;  $p = 0,050$ ). El Span de Símbolos y la edad de inicio juntos, sin embargo, originaron un modelo que influyó en el 17% de la varianza ( $F_{2,33} = 3,369$ ;  $p = 0,047$ ;  $R^2$  ajustado = 0,119; ver la figura).

**Figura Los determinantes de una pobre memoria autobiográfica en epilepsia varían según la edad de inicio**

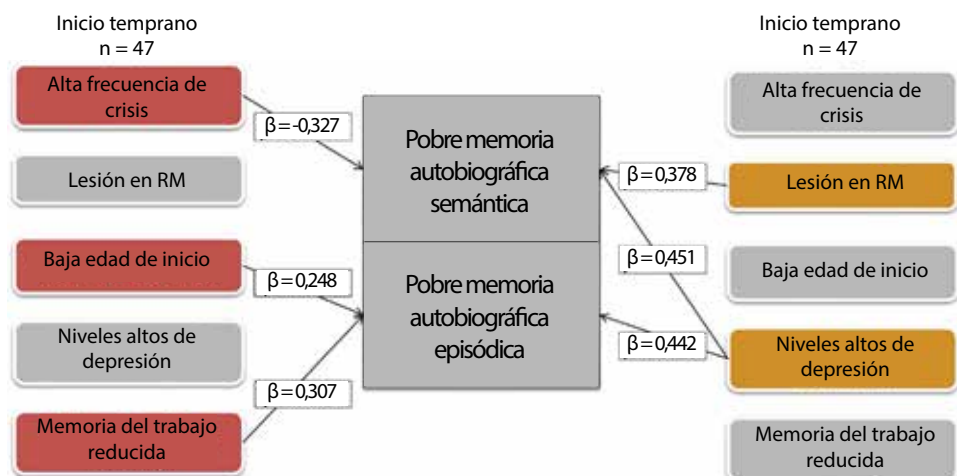

El recuerdo alterado de memoria autobiográfica en pacientes con epilepsia de inicio temprano está asociado con índices de mayor cronicidad de crisis y memoria del trabajo reducida, mientras que la alteración vista en pacientes con epilepsia de inicio tardío es mayormente predecible por los elevados síntomas de depresión.  $\beta$  = coeficiente estandarizado.

### **Alteraciones autobiográficas en epilepsia de inicio tardío asociadas a depresión.**

En contraste, la pobre memoria semántica en la epilepsia de inicio tardío estuvo asociada con mayores puntajes de depresión en el NDDI-E ( $r = -0,393$ ;  $p = 0,007$ , TE mediano-grande). Los correlatos cognitivos incluyeron puntajes de menor escala para Diseños-I de recuerdo inmediato ( $r = 0,429$ ;  $p = 0,006$ , TE mediano-grande), Diseños-II de recuerdo tardío ( $r = 0,395$ ;  $p = 0,011$ , TE mediano), como también Span de Símbolos ( $r = 0,316$ ;  $p = 0,034$ , TE mediano). Tener lesión positiva también resultó en recordar peor los hechos semánticos (media = 53,537; DE = 7,014 vs lesión negativa: media = 57,533; DE = 3,647;  $t_{40} = -2,050$ ;  $p = 0,047$ ;  $\eta^2 = 0,306$ ; TE muy grande), como también la politerapia médica (media = 53,742; DE = 6,689) en contraste con la monoterapia (media = 58,409; DE = 3,161;  $t_{40} = 2,215$ ;  $p = 0,033$ ;  $\eta^2 = 0,109$ , TE grande). La inspección de los diagnósticos de regresión sugirió que las variables cognitivas fueron colineales, y por lo tanto en una base teórica previa, solo el Span de Símbolos fue retenida; la politerapia fue colineal con los puntajes de NDDI-E (politerapia asociada con menores puntajes de depresión) y la politerapia fue excluida. La  $R$  fue significativamente diferente a cero al final de cada etapa; sin embargo, el Span de Símbolos no agregó ninguna varianza particular y fue omitida. Solo con los puntajes de NDDI-E en la ecuación, el modelo influyó en el 15,4% de la varianza ( $F_{1,36} = 6,561$ ;  $p = 0,015$ ;  $R^2$  ajustada = -0,13). Los síntomas depresivos y el estado de lesión en conjunto, sin embargo, influyeron en el 29,4% de la varianza ( $F_{2,35} = 7,270$ ;  $p = 0,002$ ;  $R^2$  ajustada = 0,25), indicando que se consiguió un incremento significativo en  $R^2$  incluyendo el estado de lesión como un predictor de recuerdo semántico (específicamente,  $p = 0,013$ ; figura).

La pobre recolección de memorias autobiográficas episódicas en el grupo de inicio tardío también estuvo asociada con mayores puntajes de NDDI-E ( $r = 0,442$ ;  $p = 0,003$ , TE grande). Los correlatos cognitivos comprendieron puntajes reducidos en las escalas Asociados Verbales Pareados-I ( $r = 0,333$ ;  $p = 0,031$ ; TE mediano), Asociados Verbales Pareados-II ( $r = 0,352$ ;  $p = 0,024$ ; TE mediano-grande), Diseños-I ( $r = 0,303$ ;  $p = 0,041$ , TE mediano), Diseños-II ( $r = 0,414$ ;  $p = 0,008$ , TE mediano-grande) y Span de Símbolos ( $r = 0,309$ ;  $p = 0,038$ , TE mediano). Nuevamente, las variables cognitivas fueron colineales y solo el Span de Símbolos fue retenido. La  $R$  fue significativamente diferente de cero al final de cada paso, pero el Span de Símbolos no agregó ninguna varianza particular y fue omitida del modelo final. Los puntajes de depresión influyeron en el 19,5% de la varianza en la predicción de alteraciones episódicas en pacientes con epilepsia de comienzo tardío ( $F_{1,36} = 8,729$ ;  $p = 0,005$ ;  $R^2$  ajustada = -0,173; figura).

**DISCUSIÓN** Los hallazgos de este estudio indican que los mecanismos de alteración de la memoria difieren entre los pacientes de acuerdo con el momento de inicio de la enfermedad, lo que implica que la red neurocognitiva funcionante puede ser alterada por estados neurológicos y psicológicos distintivos en diferentes momentos a lo largo de la vida.

En pacientes cuyas crisis comenzaron en la niñez o adolescencia, la memoria autobiográfica empobrecida estuvo asociada con marcadores de cronicidad de enfermedad: crisis más frecuentes y menor edad de inicio de enfermedad. La relación entre las crisis crónicas y la disfunción en las redes cognitivas está bien descrita. El EEG-RMf demuestra que las redes asociadas a la cognición pueden ser coactivadas durante las descargas epileptogénicas,<sup>13</sup> incluso la epilepsia de la infancia<sup>14</sup> y a lo largo del tiempo alteran su funcionamiento y conectividad.<sup>15</sup> La red de memoria autobiográfica (RMA) conecta la corteza orbitomesial prefrontal, el cíngulo ventral anterior, el hipocampo, el cíngulo posterior, la corteza retrosplenial, el precúneo y regiones parietales.<sup>16</sup> En comparación con los controles, las personas con epilepsia exhiben una activación y conectividad alterada a través de la RMA que está asociada con una mayor duración de la epilepsia,<sup>15</sup> lo que indica que las crisis habituales alteran la función de esta red neurocognitiva a largo plazo.

Más aún, los niños con epilepsia tienen una reserva neurocognitiva reducida con la cual resistir los efectos acumulativos de la disrupción neurológica causada por las crisis regulares. El inicio temprano está asociado con un neurodesarrollo anatómicamente anormal que por lo tanto está asociado a una pobre función cognitiva,<sup>3</sup> con una vulnerabilidad cognitiva típicamente persistente a lo largo de la vida.<sup>17</sup> La aparición de desarreglos neurocognitivos persistentes alrededor del inicio de las crisis apoya la visión de que algunas alteraciones cognitivas y de comportamiento podrían ser consideradas manifestaciones primarias de la epilepsia.<sup>18</sup> De esta manera, la enfermedad de la red que dio origen a las crisis puede haber desarreglado o frenado el desarrollo de la RMA en la infancia y dar como resultado que las experiencias personales sean codificadas menos eficientemente desde ese momento. Factores contribuyentes secundarios podrían también incluir efectos colaterales de la medicación como la sedación, o “blancos” en eventos vitales debido a crisis que alteraron la conciencia.

El rol clave de la memoria de trabajo en el recuerdo autobiográfico también es evidente en el grupo de inicio temprano. Estudios de comportamiento muestran que el recuerdo autobiográfico depende de una memoria de trabajo eficiente para seleccionar y recordar memorias personales de una forma dirigida,<sup>19</sup> procesos mediados por



la red prefronto-cingulada de la línea media de control cognitivo.<sup>20</sup> La memoria de trabajo está frecuentemente alterada en la epilepsia,<sup>21</sup> con efectos secundarios en la eficiencia del recuerdo autobiográfico.<sup>22</sup> Aunque los puntajes de la memoria de trabajo en pacientes de inicio temprano *vs* tardío fueron equívocos, la particular contribución de la pobre memoria de trabajo en una pobre memoria autobiográfica en pacientes de inicio temprano puede sugerir que las crisis tempranas alteran la red de control cognitivo en una manera especial que afecta el recuerdo eficiente de detalles autobiográficos.

En contraste, las alteraciones de la memoria autobiográfica evidenciadas en personas con crisis de inicio tardío estuvieron principalmente provocadas por síntomas depresivos, lo que sugiere que los desajustes psicológicos hacia las crisis en la adultez tienen una carga cognitiva. Esto es proporcional a la evidencia de que el recuerdo autobiográfico empobrecido es una característica importante en la depresión unipolar.<sup>5</sup> Aunque es problemático saber, con el diseño actual, si los déficits son en el recuerdo *vs* la codificación, la evidencia de la depresión unipolar sugiere que el problema de memoria autobiográfica en la epilepsia de inicio en la adultez puede ser un problema de recuerdo más que de codificación. Esto implicaría una disfunción prefrontal inferior en la RMA.<sup>19</sup> En consecuencia, la investigación específica de la epilepsia muestra que la severidad de los síntomas depresivos predice la extensión de la disfunción de memoria,<sup>23</sup> con una pobre elaboración verbal de memorias asociada a una función frontotemporal ipsilateral anormal.<sup>24</sup> Una interpretación de estos hallazgos convergentes podría ser que la depresión y las alteraciones de memoria concurrentes en la epilepsia comparten un sustrato de red común que ha sido desorganizado por la enfermedad, resultando tanto en crisis como en características psiquiátricas y cognitivas.<sup>18</sup> La RMA es un candidato lógico.

La hiperactividad y la hiperconectividad de la RMA es una neuroimagen característica de la

depresión, y se piensa que origina los síntomas cognitivos de la enfermedad como la rumiación y las recolecciones autobiográficas vagas.<sup>5,25</sup> Aunque especulativo, los hallazgos actuales pueden indicar que los pacientes de inicio en la adultez están demasiado comprometidos en procesos autobiográficos introspectivos como parte de los procesos de reencuadre que ocurren luego del diagnóstico, mientras luchan con los sentimientos intensos de pérdida de control e identidad alterada.<sup>26</sup> Esta interpretación puede también de alguna manera justificar el hallazgo de que el grupo de comienzo tardío no tuvo tasas mayores de síntomas depresivos que el grupo de comienzo temprano; en todo caso, sus síntomas depresivos pueden tener un “sabor” más cognitivo que recluta la RMA, como se ve en investigaciones recientes en las que se muestra que el fenotipo cognitivo de la depresión predomina en la epilepsia, especialmente en aquellos con inicio en la adultez (ver apéndice e-2).

La alteración en la memoria episódica en la epilepsia de comienzo tardío también estuvo parcialmente predicha por la presencia de una lesión en la RM. Las lesiones estructurales conllevan un riesgo adicional de disfunción cognitiva con efectos acumulativos en las redes cognitivas.<sup>27</sup> Más aún, a pesar de ser epileptogénicamente “latentes”, estas lesiones, sin embargo, pueden haber desviado la maduración de las redes cognitivas importantes para la memoria autobiográfica,<sup>28</sup> tal vez sugiriendo que algunos síndromes de inicio en la adultez reflejan un trastorno subyacente del desarrollo cognitivo.

La llamativa implicancia de este estudio es que el momento del inicio de la enfermedad determina los factores que subyacen a las alteraciones de memoria en la epilepsia. Aunque no sea novedoso sugerir que las crisis en la infancia son “malas” para el desarrollo cerebral, estos datos van más allá, sugiriendo que las características divergentes clínicas, de comportamiento y cognitivas de la epilepsia tienen niveles de influencia fluctuantes sobre las redes cognitivas funcionantes, de-

**Tabla 3** Ejemplo de una nosología de epilepsia focal inclusiva de redes cognitivas

| Fenotipo                                  | Características clínicas, cognitivas y de comportamiento                                                                                                                                                                       | Redes neurocognitivas involucradas | Sustrato genético molecular | Contexto psicosocial                                                                                                                                                 |
|-------------------------------------------|--------------------------------------------------------------------------------------------------------------------------------------------------------------------------------------------------------------------------------|------------------------------------|-----------------------------|----------------------------------------------------------------------------------------------------------------------------------------------------------------------|
| <b>Epilepsia focal de inicio temprano</b> | Crisis focales refractarias que comienzan a los 0-19 años; niveles elevados de disfunción de memoria y depresión; pobre recuerdo de memoria autobiográfica asociada a memoria de trabajo reducida e índices de crisis crónicas | RMA y RCC                          | A ser descubierto           | Ej., dinámica familiar alterada por la presencia de un niño enfermo, oportunidades escolásticas reducidas, la epilepsia como una parte central de la identidad, etc. |
| <b>Epilepsia focal de inicio tardío</b>   | Crisis focales refractarias que comienzan en > 19 años; niveles elevados de disfunción de memoria y depresión; pobre recuerdo de memoria autobiográfica asociada principalmente a síntomas de depresión                        | RMA y red afectiva                 | A ser descubierto           | Ej., ajuste psicológico a la epilepsia; egocentrismo aumentado y cambios súbitos del empleo pueden aumentar el estrés familiar, etc.                                 |

Abreviaturas: RCC = red de control cognitivo;<sup>20</sup> RMA = red de memoria autobiográfica.<sup>16</sup>

pendiendo de la etapa de madurez cerebral. Las redes cerebrales asociadas a la cognición son un sistema dinámico del cual pueden emerger diferentes corrientes de funcionamiento.

Para pacientes cuya epilepsia se presentó en la infancia o adolescencia, la enfermedad coincide con la progresión del cerebro de un cúmulo de células inmaduras a una serie de redes altamente sofisticadas.<sup>29</sup> Las crisis en este período pueden resultar en cambios fisiológicos no vistos en las epilepsias de inicio en la adultez, como los brotes aberrantes en el hipocampo, neurogénesis reducida y distribución anómala de receptores de glutamato, con las crisis recurrentes que profundizan anormalidades a largo plazo.<sup>29</sup> En concordancia, las redes cognitivas de los pacientes con inicio temprano pueden ser construidas de forma diferente. Por ejemplo, las mediciones de grosor cortical de adultos jóvenes con epilepsia de ausencia infantil resuelta (n = 30) mostraron que en relación con los controles (n = 56), la enfermedad había alterado el desarrollo del eje de una red cognitiva anterior, con el efecto en cascada de enlentecer el desarrollo tardío de redes posteriores<sup>30</sup> –evidencia de que el inicio temprano desvía el normal desarrollo de las redes neurocognitivas en la adultez.

En contraste, una vez que el impulso principal del desarrollo ha terminado, el funcionamiento de las redes cognitivas en pacientes con crisis de inicio en la adultez permanece vulnerable a alterarse por enfermedades psiquiátricas o defectos estructurales cerebrales concurrentes. Las redes funcionales como la RMA son mejor consideradas como puntos de actividad neural en constante cambio,<sup>31</sup> mientras que la arquitectura neural y conexiones estáticas tienen la capacidad de flexibilizarse para reconfigurar sus conexiones en respuesta a demandas internas y externas.<sup>31</sup> La alteración crónica, sin embargo, puede aparecer en el contexto de una función anormal persistente asociada con una enfermedad psiquiátrica o un cambio estructural.<sup>25</sup>

Este estudio resalta el valor clínico y de investigación de la subtipificación de pacientes en fenotipos más homogéneos. Dado que los sistemas de redes cognitivas son dinámicos, cualquier funcionamiento anormal tiene el potencial de ser reversible; esto es consistente con evidencia meta-analítica de que la hiperactivación de la RMA en la depresión unipolar se normaliza una vez que la enfermedad es tratada y en remisión.<sup>32</sup> La fenotipificación hace este esfuerzo más preciso.<sup>33</sup> Por ejemplo, asociar un fenotipo de epilepsia focal que tiene un perfil de red cognitiva distintivo con polimorfismos de genes conocidos podría dar claves sobre qué vías moleculares podrían ser objetivo de un tratamiento etiológico para ese fenotipo específico. Un enfoque amplio involucra el nivel aumentado de detalle neurobiológico

en los criterios de clasificación de la epilepsia,<sup>34</sup> alineando los signos y síntomas de los fenotipos de epilepsia a sus contextos ambientales, patrones de neuroimagen y sustratos moleculares (ver tabla 3 para un ejemplo). Este enfoque podría hacer que la práctica clínica sea más individualizada, considerando las características neurológicas cognitivas y neuropsiquiátricas observadas en el individuo, incluyendo pronósticos diferenciales y opciones de tratamiento.

En conclusión, los resultados de este estudio apoyan el enfoque a lo largo de toda la vida para comprender las alteraciones cognitivas comunes a la neurología, tomando en cuenta los efectos deletéreos de las crisis sobre el cerebro en desarrollo, como también los procesos psicológicos asociados con el ajuste a una enfermedad crónica. Diferentes predictores de disfunción de la RMA en diferentes síndromes epilépticos apoyan el uso de la fenotipificación neurocognitiva como un método válido para generar una investigación neurológica individualizada. Crucialmente, la estrecha interrelación de la cognición y el comportamiento en la epilepsia sugiere que estas funciones pueden compartir sustratos neurales, y cuestiona la utilidad de estudiarlos como epifenómenos separados de la epilepsia.

## CONTRIBUCIONES DE LOS AUTORES

Genevieve Rayner: participó lo suficiente en el trabajo para tomar la responsabilidad como un autor, incluyendo el borrador/ revisión del manuscrito para contenido incluso la escritura médica, diseño y concepto del estudio, análisis o interpretación de datos, adquisición de datos, análisis estadístico, como también coordinación del estudio. Graeme Jackson: participó lo suficiente en el trabajo para tomar la responsabilidad como un autor, incluyendo la revisión del manuscrito para contenido incluso la escritura médica, concepto del estudio, interpretación de datos, como también supervisión del estudio. Sarah Wilson: participó lo suficiente en el trabajo para tomar la responsabilidad como un autor, incluyendo la revisión del manuscrito para contenido incluso la escritura médica, concepto y diseño del estudio, interpretación de datos, como también supervisión del estudio.

## RECONOCIMIENTOS

Los autores agradecen a todos los pacientes y sus familias que generosamente participaron en este estudio por ninguna otra razón más que los avances de la investigación neurológica y mejorar la calidad de vida de los otros pacientes. Los autores también reconocen con agradecimiento el apoyo de los colegas del Melbourne School of Psychological Sciences, como también de los Comprehensive Epilepsy Programmes de Austin Health y Melbourne Health, particularmente el director de CEP en Austin Health, Profesor Sam Berkovic.

## FONDOS PARA EL ESTUDIO

El trabajo de G.J. es apoyado por una beca NHMRC Program Grant (400121), un NHMRC Practitioner Fellowship (527800) y una beca Victorian Government Operational Infrastructure Support Grant.

## DECLARACIÓN DE INTERESES

G. Rayner no tiene nada para declarar relevante al manuscrito. G. Jackson es apoyado por una NHMRC Program Grant (400121), un NHMRC Practitioner Fellowship (527800), y la Victorian Government Operational Infrastructure Support Grant Scheme. S. Wilson no tiene nada para declarar relevante al manuscrito. Ir a [Neurology.org](http://Neurology.org) para declaraciones completas.

Recibido el 3 de marzo de 2016. Aceptado en su formato final el 17 de mayo de 2016.

## BIBLIOGRAFÍA

1. Herfurth K, Kasper B, Schwarz M, Stefan H, Pauli E. Autobiographical memory in temporal lobe epilepsy: role of hippocampal and temporal lateral structures. *Epilepsy Behav* 2010;19:365–371.
2. Rayner G, Jackson GD, Wilson SJ. Behavioral profiles in frontal lobe epilepsy: autobiographic memory versus mood impairment. *Epilepsia* 2015;56:225–233.
3. Hermann BP, Dabbs K, Becker T, et al. Brain development in children with new onset epilepsy: a prospective controlled cohort investigation. *Epilepsia* 2010;51:2038–2046.
4. Fuller-Thomson E, Brennenstuhl S. The association between depression and epilepsy in a nationally representative sample. *Epilepsia* 2009;50:1051–1058.
5. Williams JM. Capture and rumination, functional avoidance, and executive control (CaRFAX): three processes that underlie overgeneral memory. *Cogn Emot* 2006;20:548–568.
6. Jackson GD, Berkovic SF, Tress BM, Kalnins RM, Fabinyi GC, Bladin PF. Hippocampal sclerosis can be reliably detected by magnetic resonance imaging. *Neurology* 1990;40:1869–1875.
7. Kopelman MD, Wilson BA, Baddeley AD. *The Autobiographical Memory Interview*. Bury St. Edmunds, UK: Thames Valley Test Company; 1990.
8. Wechsler D. *Wechsler Memory Scale*, 4th ed. San Antonio: Pearson Assessment; 2009.
9. First MB, Spitzer RL, Gibbon M, Williams JB. *Structured Clinical Interview for DSM-IV-TR Axis I Disorders, Research Version, Non-Patient Edition (SCID-I/NP)*. New York: Biometrics Research, New York Psychiatric Institute; 2002. Available at: <http://www.scid4.org/>. Accessed September 5, 2016.
10. Gilliam FG, Barry JJ, Hermann BP, Meador KJ, Vahle V, Kanner AM. Rapid detection of major depression in epilepsy: a multicentre study. *Lancet Neurol* 2006;5:399–405.
11. Spitzer RL, Kroenke K, Williams JBW, Löwe B. A brief measure for assessing generalized anxiety disorder: the GAD-7. *Arch Intern Med* 2006;166:1092–1097.
12. World Health Organization. Adolescent health. 2014. Available at: [http://www.who.int/topics/adolescent\\_health/en/](http://www.who.int/topics/adolescent_health/en/). Accessed September 5, 2016.
13. Pillay N, Archer JS, Badawy RAB, Flanagan DE, Berkovic SF, Jackson G. Networks underlying paroxysmal fast activity and slow spike and wave in Lennox-Gastaut syndrome. *Neurology* 2013;81:665–673.
14. Berman R, Negishi M, Vestal M, et al. Simultaneous EEG, fMRI, and behavior in typical childhood absence seizures. *Epilepsia* 2010;51:2011–2022.
15. Liao W, Zhang Z, Pan Z, et al. Default mode network abnormalities in mesial temporal lobe epilepsy: a study combining fMRI and DTI. *Hum Brain Mapp* 2011;32:883–895.
16. Spreng RN, Mar RA, Kim ASN. The common neural basis of autobiographical memory, prospection, navigation, theory of mind, and the default mode: a quantitative meta-analysis. *J Cogn Neurosci* 2009;21:489–510.
17. Baxendale S, Heaney D, Thompson PJ, Duncan JS. Cognitive consequences of childhood-onset temporal lobe epilepsy across the adult lifespan. *Neurology* 2010;75:705–711.
18. Wilson SJ, Baxendale S. The new approach to classification: rethinking cognition and behavior in epilepsy. *Epilepsy Behav* 2014;41:307–310.
19. Baldo JV, Shimamura AP. Frontal lobes and memory. In: Baddely AD, Kopelman MD, Wilson BA, editors. *The Handbook of Memory Disorders*. Hoboken, NJ: John Wiley & Sons Ltd.; 2002.
20. Fox MD, Snyder AZ, Vincent JL, Corbetta M, Essen DCV, Raichle ME. The human brain is intrinsically organized into dynamic, anticorrelated functional networks. *Proc Natl Acad Sci USA* 2005;102:9673–9678.
21. Stretton JJ, Winston G, Sidhu M, et al. Neural correlates of working memory in temporal lobe epilepsy: an fMRI study. *Neuroimage* 2012;60:1696–1703.
22. Drane DL, Lee GP, Cech H, et al. Structured cueing on a semantic fluency task differentiates patients with temporal versus frontal lobe seizure onset. *Epilepsy Behav* 2006; 9:339–344.
23. Dulay MF, Scheffl BK, Fargo JD, Privitera MD, Yeh H. Severity of depressive symptoms, hippocampal sclerosis, auditory memory, and side of seizure focus in temporal lobe epilepsy. *Epilepsy Behav* 2004;5:522–531.
24. Helmstaedter C, Sonntag-Dillender M, Hoppe C, Elger C. Depressed mood and memory impairment in temporal lobe epilepsy as a function lateralization and localization. *Epilepsy Behav* 2004;5:696–701.
25. Rayner G, Jackson G, Wilson S. Cognition-related brain networks underpin the symptoms of unipolar depression: evidence from a systematic review. *Neurosci Biobehav Rev* 2016;61:53–65.
26. Velissaris SL, Wilson SJ, Saling MM, Newton MR, Berkovic SF. The psychological impact of a newly diagnosed seizure: losing and restoring perceived control. *Epilepsy Behav* 2007;10:223–234.
27. Fuerst D, Shah J, Kupsky WJ, et al. Volumetric MRI, pathological, and neuropsychological progression in hippocampal sclerosis. *Neurology* 2001;57:184–188.
28. Bell B, Lin JJ, Seidenberg M, Hermann B. The neurobiology of cognitive disorders in temporal lobe epilepsy. *Nat Rev Neurol* 2011;7:154–164.
29. Ben-Ari Y, Holmes GL. Effects of seizures on developmental processes in the immature brain. *Lancet Neurol* 2006;5:1055–1063.
30. Curwood EK, Pedersen M, Carney PW, Berg AT, Abbott DE, Jackson GD. Abnormal fronto-temporal cortex in childhood absence epilepsy: a cortical thickness connectivity study. *Ann Clin Transl Neurol* 2015;2:456–464.
31. Sporns O. The human connectome: a complex network. *Ann NY Acad Sci* 2011;1224:109–125.
32. Delaveau P, Jabourian M, Lemogne C, Guionnet S, Bergouignan L, Fossati P. Brain effects of antidepressants in major depression: a meta-analysis of emotional processing studies. *J Affect Disord* 2011;130:66–74.
33. Berkovic SF, Jackson GD. “Idiopathic” no more! Abnormal interaction of large-scale brain networks in generalized epilepsy. *Brain* 2014;137:2400–2402.
34. Insel T, Cuthbert B, Garvey M, et al. Research domain criteria (RDoC): toward a new classification framework for research on mental disorders. *Am J Psychiatry* 2010;167:748–751.
